# Supplementary material for: Exploration of selective decoration of Janus silica particles within polymeric patterned pore arrays
Source: Royal Society of Chemistry journal article supplement (doi:10.1039/c6ra10035j), 2016-01-01
Supplement: c6ra10035j1.pdf [file c6ra10035j1.pdf]

Supplementary Information for

## Exploration of Selective Decoration of Janus Silica Particles within Polymeric Patterned Pore Arrays

Pinghui Yang<sup>a,b</sup>, Junjie Huang<sup>a,b</sup>, Wei Sun<sup>\*a,b</sup>, Yujie Wei<sup>a,b</sup>, Yuwei Liu<sup>a,b</sup>, Lingyun Ding<sup>a,b</sup>,  
Jinbiao Bao<sup>a,b</sup>, Zhong-Ren Chen<sup>a,b</sup>

<sup>a</sup> Department of Polymer Science and Engineering, Faculty of Materials Science and  
Chemical Engineering, Ningbo University, Ningbo, 315211, China

<sup>b</sup> Key Laboratory of Specialty Polymers, Faculty of Materials Science and Chemical  
Engineering, Ningbo University, Ningbo, 315211, China

\*Corresponding author and E-mail: sunwei@nbu.edu.cn

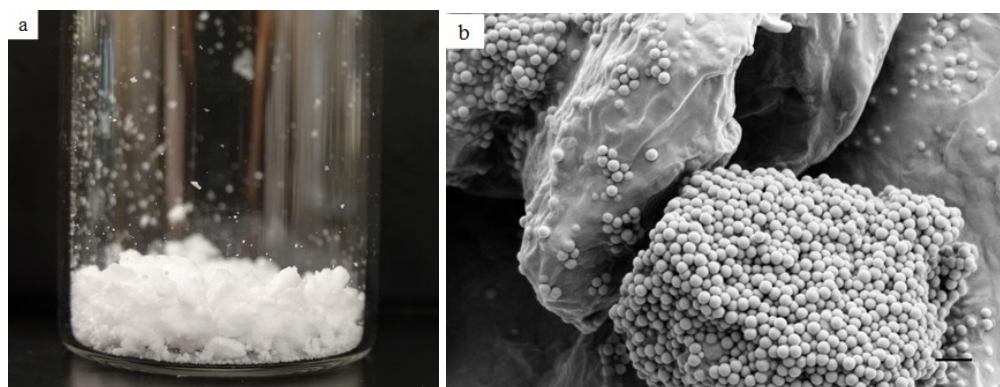

**Figure S1.** (a) Digital photograph and (b) SEM images of colloidosomes collected mostly by scraping solidified product on the flask walls. (550 nm SiO<sub>2</sub>-OH). The scale bar is 2 μm.

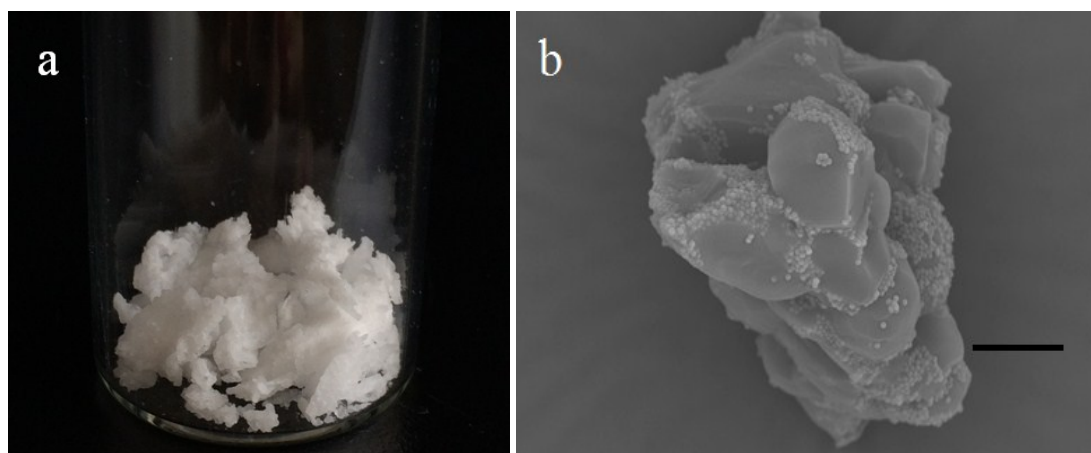

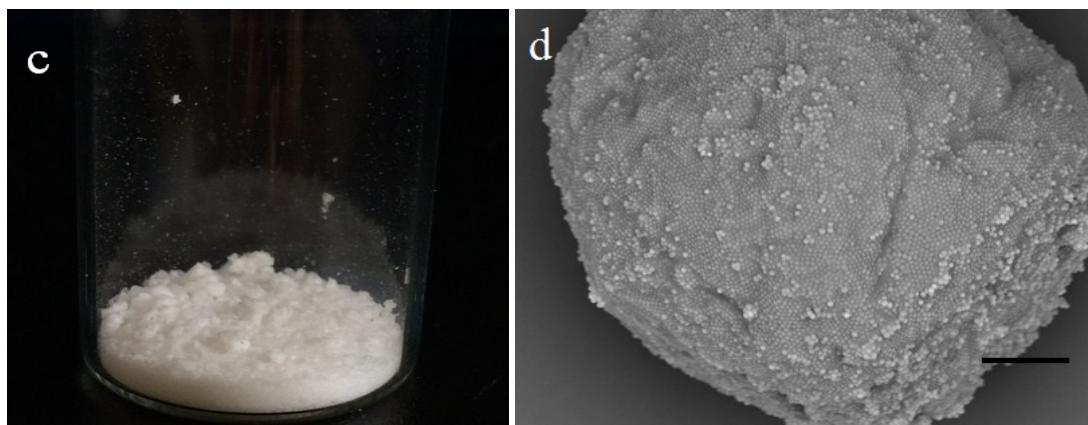

**Figure S2.** Colloidosomes produced following different cooling methods: (a) colloidosomes collected after conventional self-cooling; (b) SEM image of representative wax structures from the batch showed in (a); (c) colloidosomes collected following “inside out” cooling strategy; (d) SEM image of representative wax structures from the batch showed in (c). The scale bars are 10  $\mu\text{m}$ .
